# Supplementary material
Source: MDPI journal article supplement (https://www.mdpi.com/2073-4441/16/7/1030)

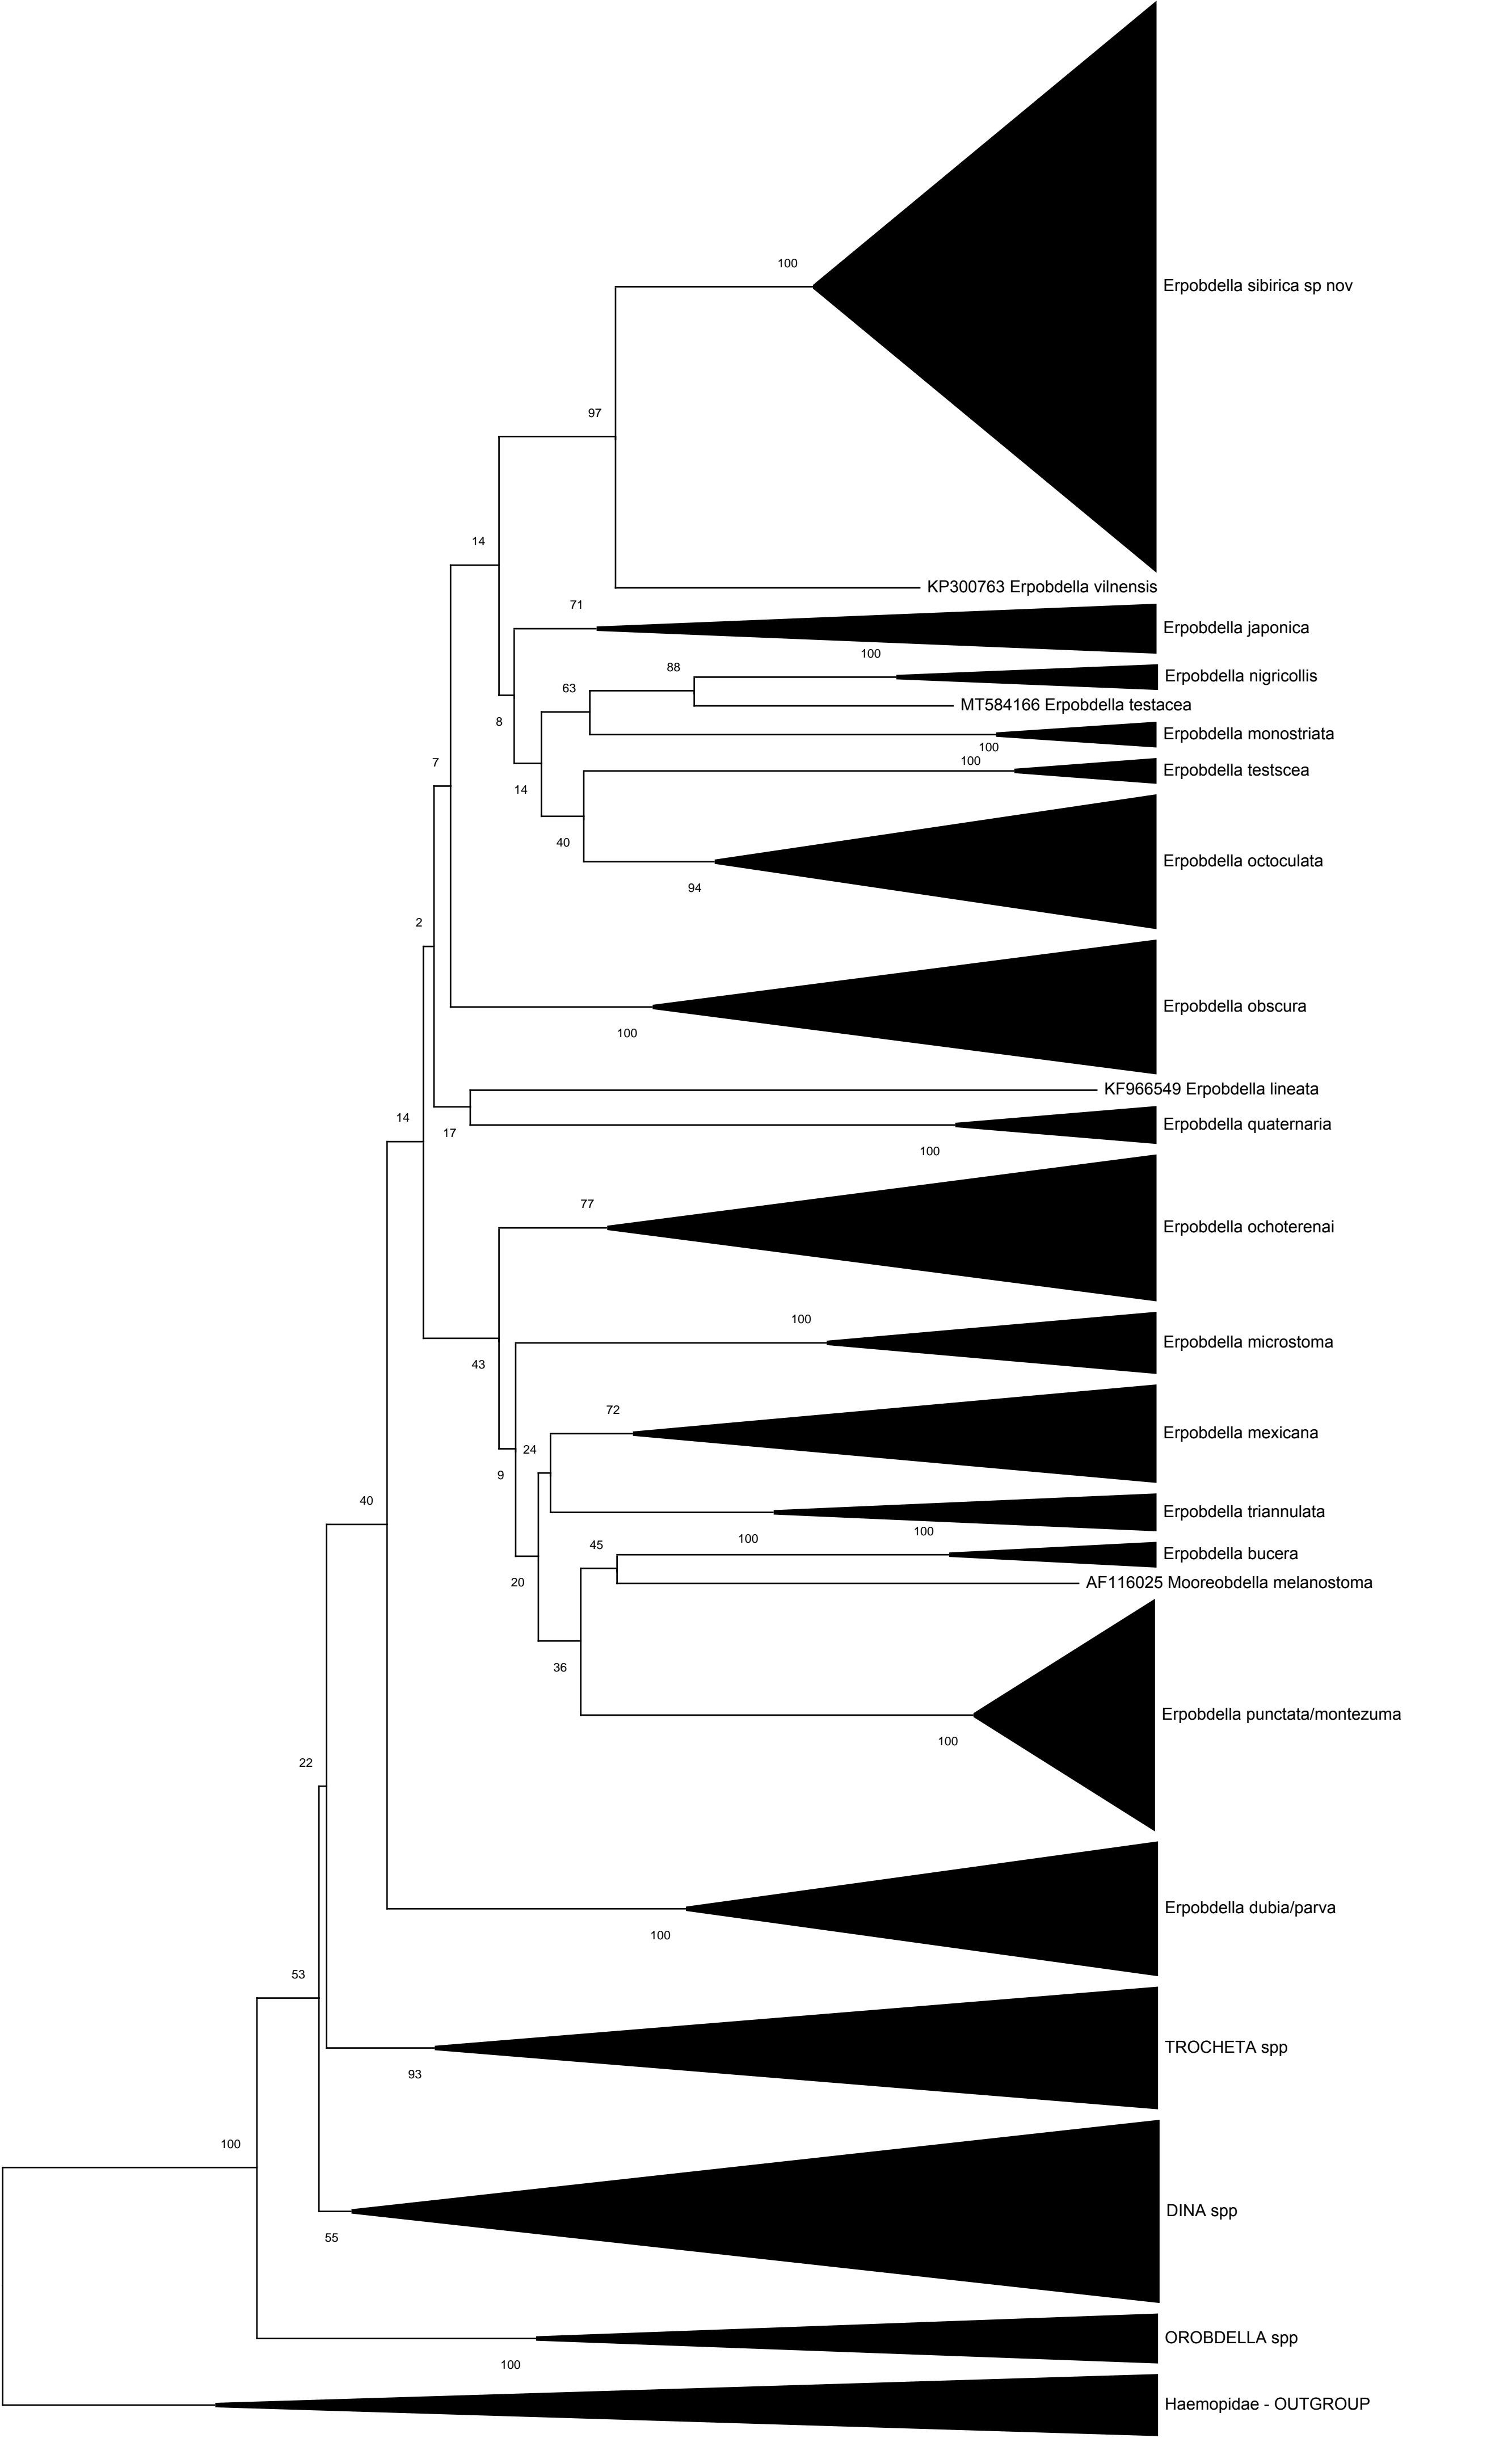

0.050

Supplement: s1 [file s1]
